# Supplementary material for: Dynamics of polymer chains confined to a periodic cylinder: molecular dynamics simulation vs. Lifson–Jackson formula
Source: Royal Society of Chemistry journal article supplement (doi:10.1039/d3cp02276e), 2023-01-01
Supplement: d3cp02276e1.pdf [file d3cp02276e1.pdf]

## **Supplementary Information**

### **Dynamics of polymer chain confined in a periodic cylinder: Molecular dynamics simulation vs Lifson-Jackson formula**

Jiaxin Wu, Zhiyong Yang, Xiaou Cai and Linxi Zhang

#### **S1. The initial equilibrium of system**

Figure S1 shows the total potential energy of a single flexible polymer chain confined in a periodic cylinder with  $L_1=L_2=16$  as a function of the iteration steps  $t'$ . Here the total potential energy  $E$  includes all bond and nonbond energies for polymers. The evolution of the total potential suggests that the simulated system has been equilibrated after  $1 \cdot 10^7$  steps and the point  $t=0$  means that one begins to collect the samples.

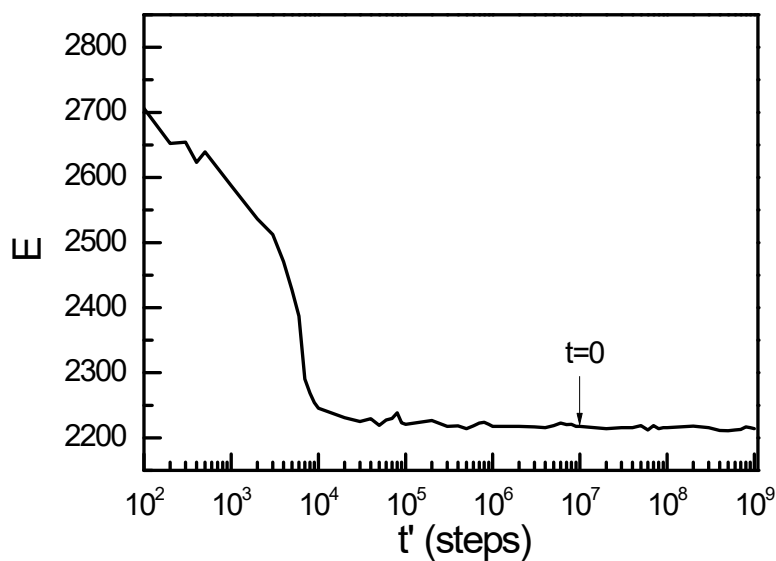

Fig. S1. The total potential energy of the system  $E$  as a function of the iteration step  $t'$ .  $t=0$  is marked at  $t'=1 \cdot 10^7$  (steps). Here  $N=100$ , and  $L_1=L_2=16$ .

## S2. The simulation box sizes with different periodicities of cylinder $L$

The size of simulation box relies on the periodicity of cylinder  $L$ , and the detailed data for the simulation box of  $L_x \times 100 \times 100$  is given in Table S1. Here the cylinder is set periodically in the  $x$ -direction.

Table S1. The size of simulation box along the x-direction,  $L_x$ , with different periodicities of cylinder L and different chain lengths N.

| $L$ | $L_x$        |                    |                    |
|-----|--------------|--------------------|--------------------|
|     | $N \leq 100$ | $100 < N \leq 200$ | $200 < N \leq 300$ |
| 8   | 96           |                    |                    |
| 16  | 96           |                    |                    |
| 28  | 112          | 140                | 224                |
| 32  | 96           | 160                | 224                |
| 36  | 108          | 144                | 216                |
| 40  | 120          | 160                | 240                |
| 48  | 96           |                    |                    |

### S3. The diffusion behavior of a single flexible polymer chain in free space

In order to explore the effects of the confinement size on the conformations and dynamics of polymer chain, we investigate the average size and the diffusion behavior of a single flexible polymer chain in free space and the results are shown in Figs. S2 and S3.

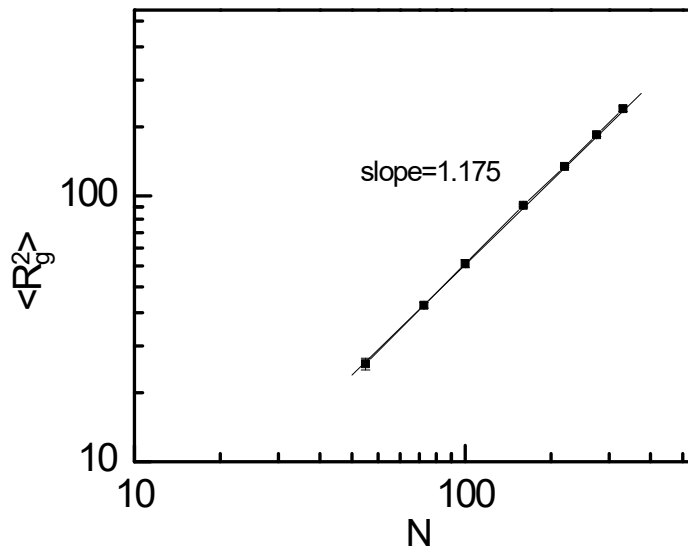

Fig. S2. The mean-square radius of gyration  $\langle R_g^2 \rangle$  of a single flexible polymer chain as a function of chain length N in free space.

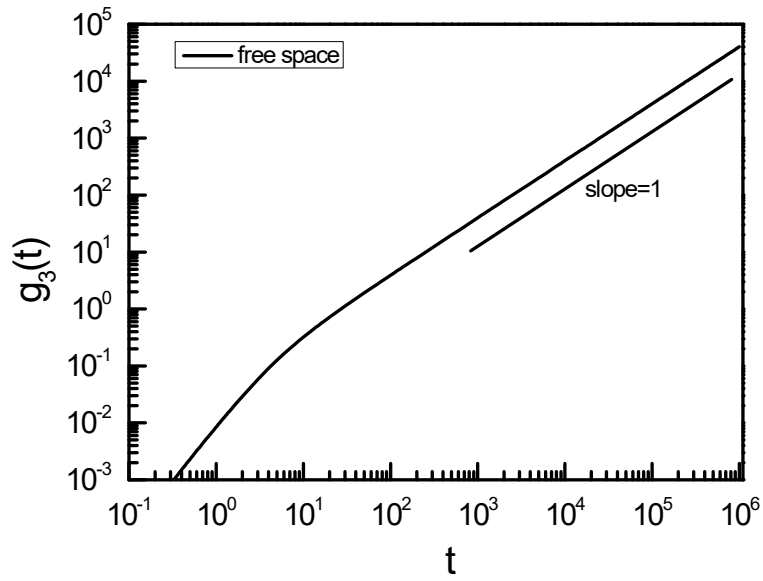

Fig. S3. MSD of the center-of-mass along the x-direction,  $g_{3,x}(t)$ , of a single flexible polymer chain in free space. Here  $N=100$ , and  $R_g = \sqrt{\langle R_g^2 \rangle} = 7.46$ .

#### S4. The effects of confinement size $d$ on the dynamics of a single polymer chain confined in an infinite cylinder

We calculate the diffusion coefficient  $D$  of a single polymer chain confined in an infinite cylinder with different channel sizes  $d$  (i.e., the diameter of channel), and the results are shown in Fig. S4. Although the diffusion coefficients for  $d=7$  and  $d=10$  are approximately equal ( $D \approx 0.02$ ), the effects of channel size on diffusion coefficient are obvious for the strong confinement, and the diffusion coefficient  $D$  decreases abruptly with the channel size  $d$  decreases for  $d \leq 6$ . For example, it decreases from  $D=0.019$  for  $d=6$  to  $D=0.010$  for  $d=3$ .

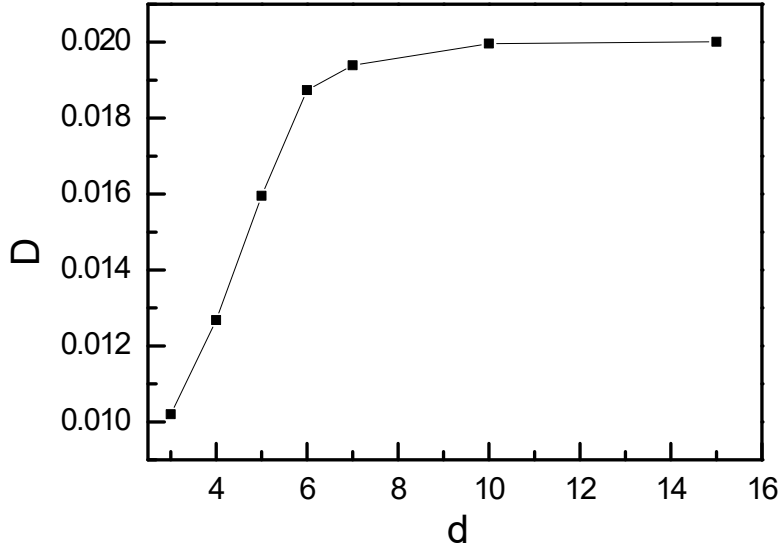

Fig S4. The diffusion coefficient  $D$  of a single polymer chain confined in an infinite cylinder as a function of the diameter of infinite cylinder  $d$ . Here the diameter of infinite cylinder is uniform and  $N=100$ .

**S5. The detailed diffusion behavior of a single polymer chain confined in a periodic cylinder under the condition of  $L_1 + L_2 = 40$**

There are two opposing effects. On the one hand, if  $L_1$  is small, there is not enough space in a cavity for the whole chain. If  $L_1$  is large, the constriction parts of the channel are shorter and the chain does not lose as much entropy if it crosses one. However, these two effects are not symmetric, and the slowest diffusion occurs at  $L_1 \neq L_2$ . In order to prove this hypothesis, we calculate the diffusion coefficient  $D$  with different  $L_1$  of  $L_1=19, 21, 22, 23, 24,$  and  $25$  under the condition of  $L_1 + L_2 = 40$ , and the results are shown in Figure S5. Actually, the slowest diffusion occurs at  $L_1=23$ , not  $L_1=20$ , which can prove that these two effects are not symmetric.

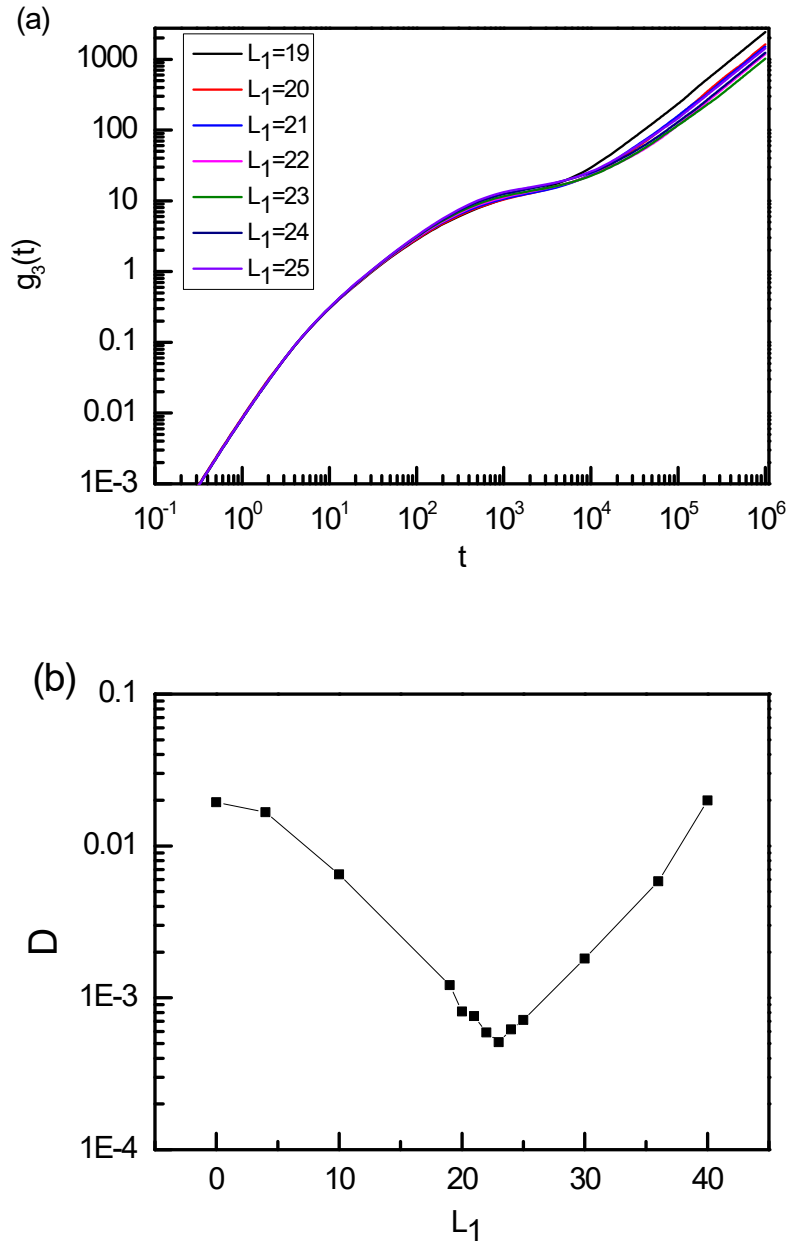

Fig. S5. (a) MSD of the center-of-mass,  $g_3(t)$ , of a single flexible polymer chain confined in a periodic cylinder with different lengths  $L_1$  of cavity I. (b) Diffusion coefficient  $D$  of a single flexible polymer chain confined in a periodic cylinder as a function of length of cavity I,  $L_1$ . Here the period length of cylinder keeps a constant of 40, i.e.,  $L_1 + L_2 = 40$ , and  $N=100$ .
